# Supplementary material
Source: PubMed Central journal article supplement (PMC2536864)
Supplement: 00183.2008_1.pdf [file 00183.2008_1.pdf]

**Table I. Primer sequences**

| Gene          | Primer sequence                                        | Product size |
|---------------|--------------------------------------------------------|--------------|
| ACE2          | 5'TGTGTCAGAAATGTGCGCTTC3'<br>5'CAAGGCGTATCTGTCACAGTC3' | 175          |
| AGT           | 5'GAAACCTCTCATCGTTCCTTG3'<br>5'TCTCTTTACCCCTGCCCTCT3'  | 193          |
| PPAR $\gamma$ | 5'GATGGAAGACCACTCGCATT3'<br>5'AACCATTGGGTCAGCTCTTG3'   | 115          |
| 18SRNA        | 5'AGTCGGCATCGTTTATGGTC3'<br>5'CGAAAGCATTTGCCAAGAAT3'   | 151          |

AGT = angiotensinogen

A

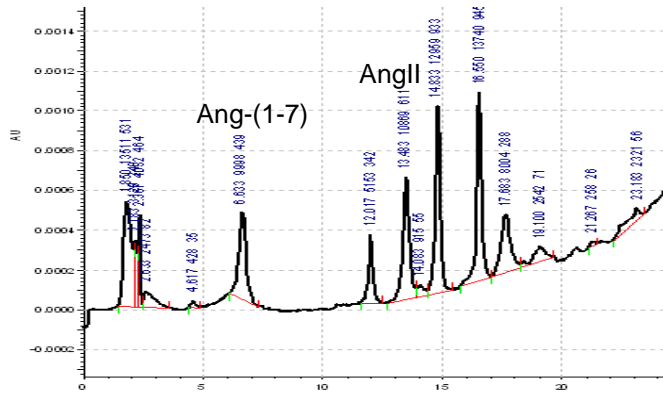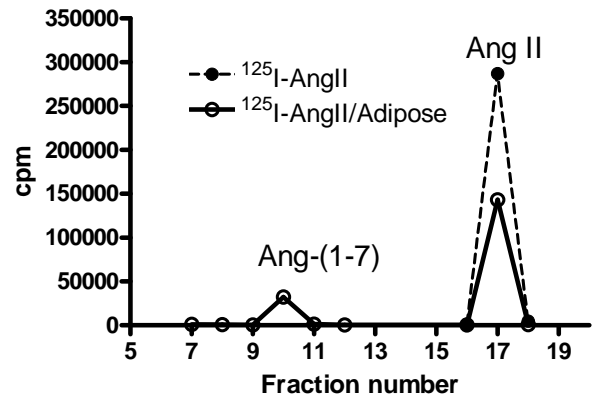

B

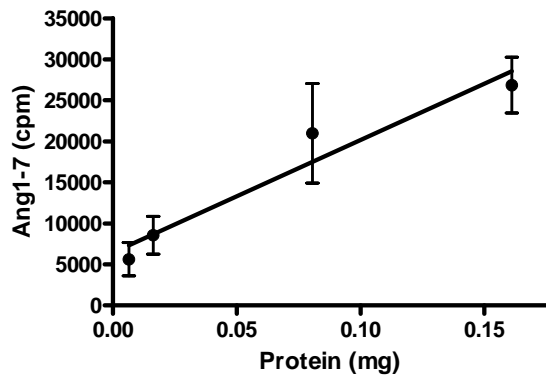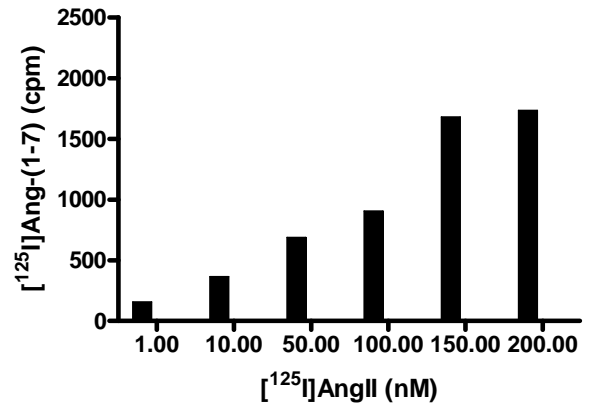

C

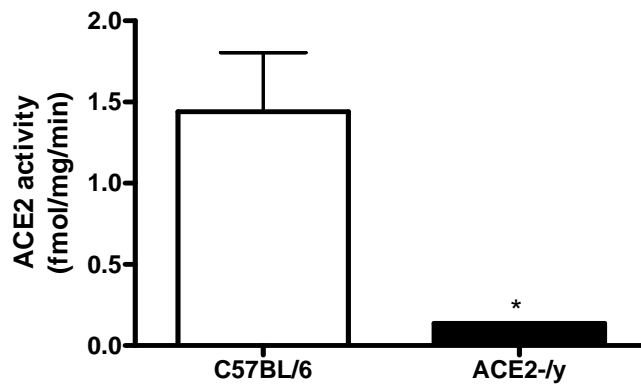

Supplemental Figure 1.

**Supplemental Figure 1. ACE2 activity measurement.** **A**, Left, HPLC chromatogram for resolution of angiotensin 1-7 (Ang-(1-7); retention time = 6.6 min) and angiotensin II (AngII; retention time = 13.6 min). Other angiotensin peptides resolved using this protocol include angiotensin III, angiotensin IV, angiotensin I and angiotensin4-8. Right, Effect of protease inhibitors on Ang-(1-7) generation. When [<sup>125</sup>I]AngII is injected onto the HPLC in the absence of adipose membrane ([<sup>125</sup>I]AngII), only one peak of radioactivity is demonstrated in HPLC fractions. In the presence of adipose membrane ([<sup>125</sup>I]AngII/adipose), radioactivity is detected in the Ang-(1-7) fraction, but not in other HPLC fractions. Radioactivity appears in HPLC fractions with a 3 minute lag time from the retention time of individual peptides. **B**, Left, ACE2 activity increases as adipose membrane protein increases. A membrane protein concentration of 0.05 mg was chosen for studies. Right, Dependence of [<sup>125</sup>I]Ang-(1-7) product formation from varying concentrations of [<sup>125</sup>I]AngII substrate. Measurements were performed at a saturating concentration of [<sup>125</sup>I]AngII substrate (200 nM). Moreover, under these experimental conditions, less than 5% of [<sup>125</sup>I]AngII substrate was hydrolyzed to [<sup>125</sup>I]Ang-(1-7), to assure that substrate concentrations were not limiting. **C**, ACE2 activity is markedly decreased in EF membranes from ACE2-/- mice compared to control (C57BL/6).

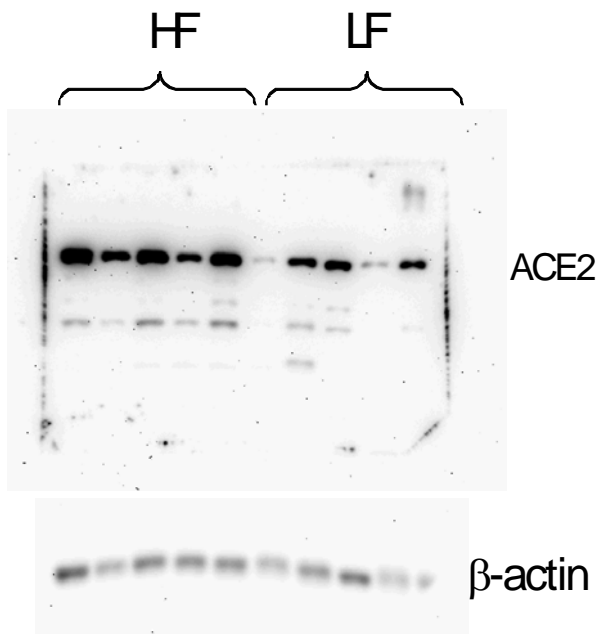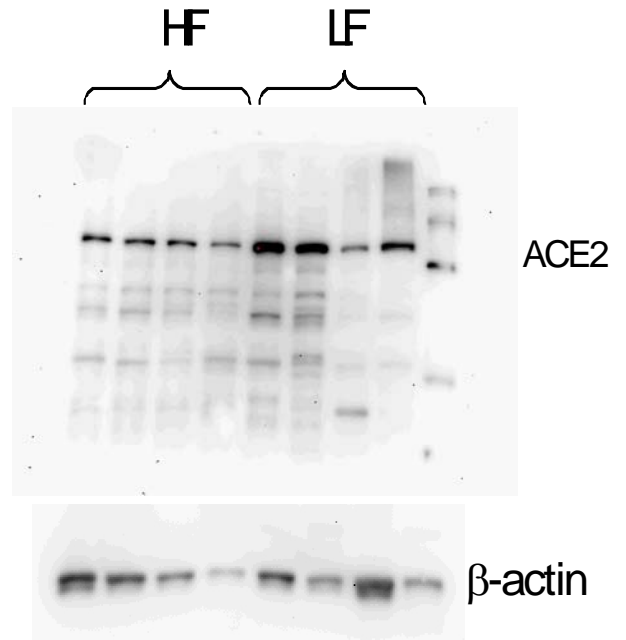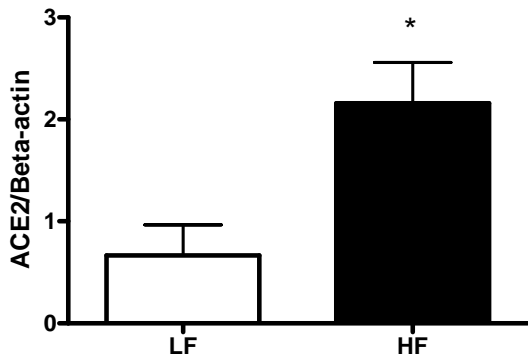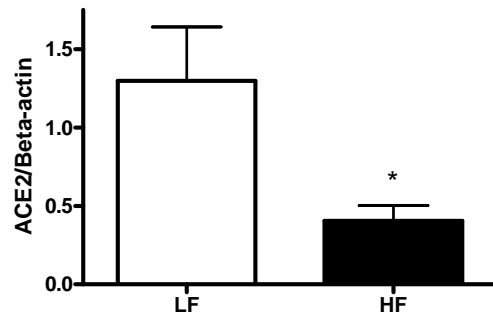

**Supplemental Figure 2. ACE2 protein in EF from 1 week and 4 month LF and HF-fed mice.** Western blotting for ACE2 was as described in methods. Expression of ACE2 increased in 1 week HF compared to LF mice, while at 4 months ACE2 protein was reduced in adipose tissue from HF-fed mice. Top, Representative western blots for ACE2 and  $\beta$ -actin in EF membranes from LF and HF-fed mice. Bottom, Densitometry for ACE2 expression normalized to  $\beta$ -actin. Data are mean  $\pm$  SEM from n = 10 mice/group. \*, denotes significantly different from LF, P < 0.05.
